# Supplementary material for: Construction of one-dimensional MoO2/NC heteronanowires for microwave absorption
Source: Royal Society of Chemistry journal article supplement (doi:10.1039/d1ra09074g), 2022-01-01
Supplement: d1ra09074g1.pdf [file d1ra09074g1.pdf]

## Supporting Information

### Construction of One-dimensional MoO<sub>2</sub>/NC Heteronanowires for Microwave Absorption

Xiaojuan Zhang, Meihua Gong, Yunliang Dai and Bianying Wen\*

College of Chemistry and Materials Engineering, Beijing Technology and Business  
University, Beijing 100048, P. R. China

**E-mail:** wenbianying@tsinghua.org.cn

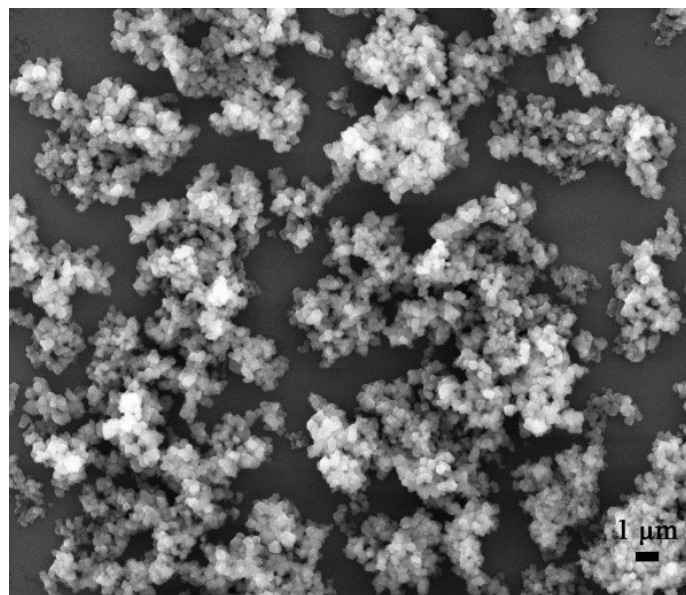

**Fig. S1** SEM image of pristine PPy nanoparticles

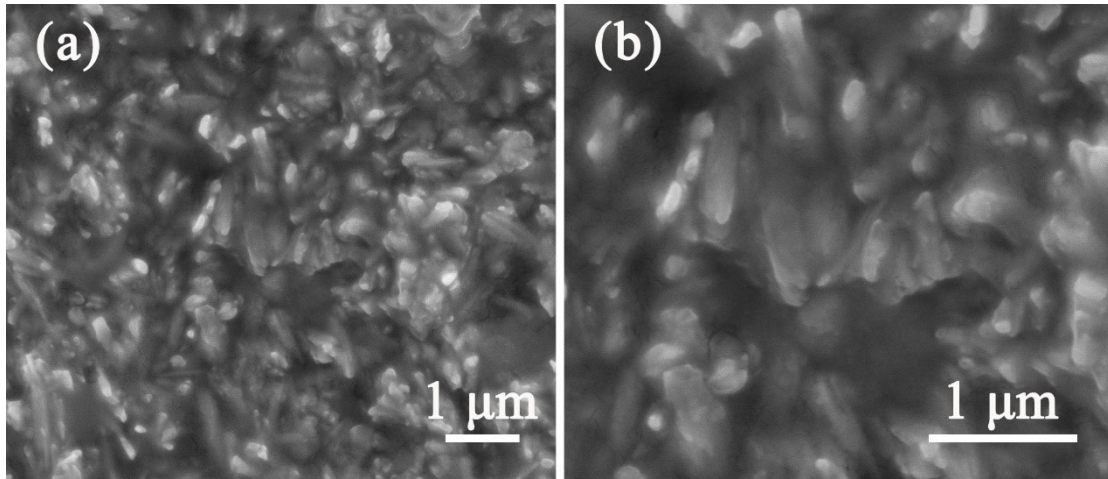

**Fig. S2** SEM images of the fracture section of MoO<sub>2</sub>/NC-TPU membrane

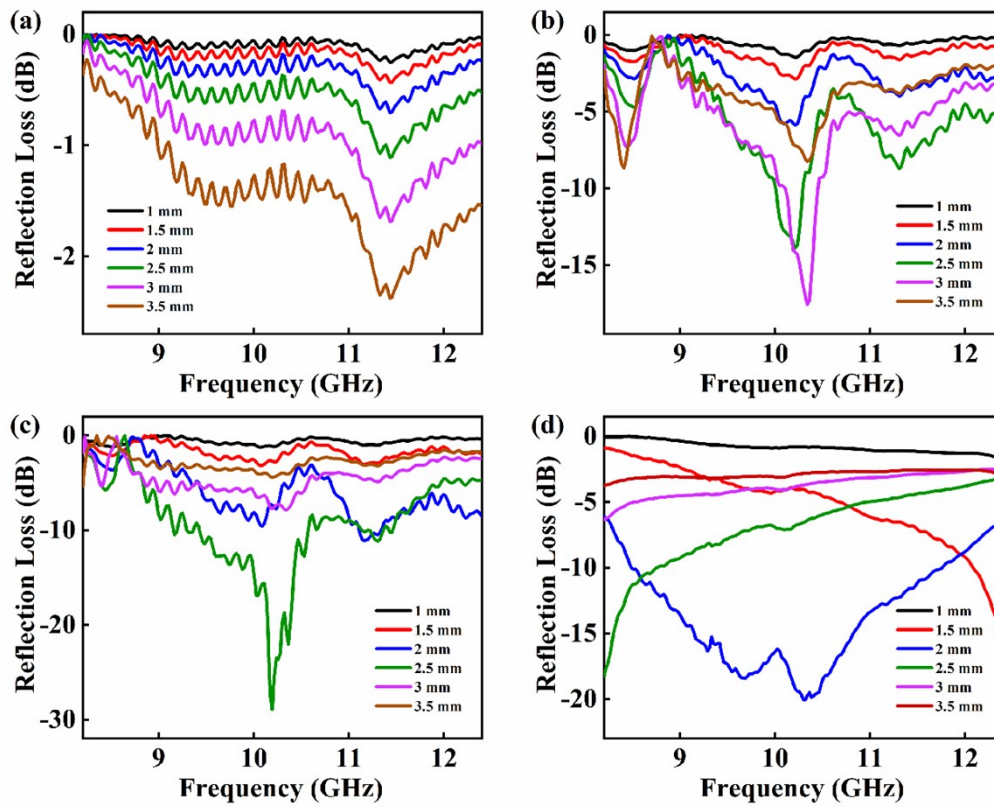

**Fig. S3** Microwave RL curves of (a) pure TPU; (b) 20 wt% MoO<sub>2</sub>/NC-TPU; (c) 30 wt% MoO<sub>2</sub>/NC-TPU and (d) 40 wt% MoO<sub>2</sub>/NC-TPU at a thickness range of 1.0-3.5 mm in X band
